# Supplementary material for: Mechanistic aspects of the chemistry of mononuclear CrIII complexes with pendant-arm macrocyclic ligands and formation of discrete CrIII/FeII and CrIII/FeII/CoIII cyano-bridged mixed valence compounds
Source: Royal Society of Chemistry journal article supplement (doi:10.1039/b909151c), 2009-01-01
Supplement: b909151c.pdf [file b909151c.pdf]

# Mechanistic Aspects of the Chemistry of Mononuclear Cr<sup>III</sup> complexes with Pendant-arm Macrocyclic Ligands and Formation of Discrete Cr<sup>III</sup>/Fe<sup>II</sup> and Cr<sup>III</sup>/Fe<sup>II</sup>/Co<sup>III</sup> Cyano-Bridged Mixed Valence Compounds.

Manuel G. Basallote,<sup>a</sup> Paul V. Bernhardt,<sup>b</sup> Teresa Calvet,<sup>c</sup> Carmen E. Castillo,<sup>a</sup> Mercè Font-Bardia,<sup>c</sup> Manuel Martínez<sup>d</sup> and Carlos Rodríguez.<sup>d</sup>

<sup>a</sup> Departamento de Ciencia de Materiales e Ingeniería Metalúrgica y Química Inorgánica, Facultad de Ciencias, Universidad de Cádiz, Apartado 40, Puerto Real, E-11510 Cádiz, SPAIN

<sup>b</sup> School of Chemistry and Molecular Biosciences, , University of Queensland, Brisbane 4072, AUSTRALIA

<sup>c</sup> Departament de Cristal·lografia, Mineralogia i Dipòsits Minerals, Universitat de Barcelona, Martí i Franquès s/n, E-08028 Barcelona, SPAIN

<sup>d</sup> Departament de Química Inorgànica, Universitat de Barcelona, Martí i Franquès 1-11, E-08028 Barcelona, SPAIN

---

Supplementary material:

**Table S1.-** Observed rate constants for the reactions studied as a function of reactants, concentrations, pH, temperature and pressure.

**Figure S1.-** Eyring plot for the slow process observed on solution of the [CrL<sub>15</sub>Cl]<sup>2+</sup> complexes depending on the starting material.

**Figure S2.-** Uv-vis changes of the spectrum of a solution of the dinuclear complex [(HL<sub>15</sub>)(H<sub>2</sub>O)Cr<sup>III</sup>NC}Fe<sup>II</sup>(CN)<sub>5</sub>], 4×10<sup>-4</sup> M, with S<sub>2</sub>O<sub>8</sub><sup>2-</sup>, 45×10<sup>-3</sup> M, at pH = 4 and 25 °C.

**Figure S3.-** Electronic spectrum changes of a solution of complex *cis*-[{(L<sub>15</sub>)(OH)Cr<sup>III</sup>NC} {*cis*-V-L<sub>13</sub>Co<sup>III</sup>NC}Fe<sup>II</sup>(CN)<sub>4</sub>]<sup>+</sup> with pH.

**Kinetics of the *trans*-II or *trans*-III-[CrCIL<sub>15</sub>]<sup>2</sup> reaction at pH 9.-**

s.p.2

**Table S1.-** Observed rate constants for the reactions studied as a function of reactants, concentrations, pH, temperature and pressure.

| Reaction                                                                                                                                                           | <i>T</i><br>/K | <i>P</i><br>/atm | [OH <sup>-</sup> ]<br>/M | pH  | 10 <sup>3</sup> ×[Cr <sup>III</sup> ]<br>/M | 10 <sup>3</sup> ×[Fe <sup>II</sup> ]<br>/M | 10 <sup>4</sup> × <i>k</i> <sub>obs</sub><br>/s <sup>-1</sup> |
|--------------------------------------------------------------------------------------------------------------------------------------------------------------------|----------------|------------------|--------------------------|-----|---------------------------------------------|--------------------------------------------|---------------------------------------------------------------|
| <i>trans-II</i> -[Cr <sup>III</sup> (OH)L <sub>15</sub> ] <sup>2+</sup><br>to <i>trans</i> -[Cr <sup>III</sup> (OH) <sub>2</sub> (L <sub>15</sub> )] <sup>+</sup>  | 303            | 1                | 0.10                     |     | 0.40                                        |                                            | 0.18                                                          |
|                                                                                                                                                                    | 313            | 1                |                          |     |                                             |                                            | 0.90                                                          |
|                                                                                                                                                                    | 323            | 1                |                          |     |                                             |                                            | 1.8                                                           |
|                                                                                                                                                                    | 327            | 300              |                          |     |                                             |                                            | 3.2                                                           |
|                                                                                                                                                                    |                | 600              |                          |     |                                             |                                            | 3.0                                                           |
|                                                                                                                                                                    |                | 900              |                          |     |                                             |                                            | 2.8                                                           |
|                                                                                                                                                                    |                | 1200             |                          |     |                                             |                                            | 2.6                                                           |
|                                                                                                                                                                    | 333            | 1                |                          |     |                                             |                                            | 6.9                                                           |
|                                                                                                                                                                    | 333            | 1                | 0.05                     |     |                                             |                                            | 7.1                                                           |
|                                                                                                                                                                    | 333            | 1                | 0.15                     |     |                                             |                                            | 6.8                                                           |
|                                                                                                                                                                    | 338            | 1                | 0.10                     |     |                                             |                                            | 8.4                                                           |
| <i>trans-III</i> -[Cr <sup>III</sup> (OH)L <sub>15</sub> ] <sup>2+</sup><br>to <i>trans</i> -[Cr <sup>III</sup> (OH) <sub>2</sub> (L <sub>15</sub> )] <sup>+</sup> | 303            | 1                | 0.10                     |     | 0.40                                        |                                            | 0.19                                                          |
|                                                                                                                                                                    | 313            | 1                |                          |     |                                             |                                            | 6.3                                                           |
|                                                                                                                                                                    | 323            | 1                |                          |     |                                             |                                            | 2.1                                                           |
|                                                                                                                                                                    | 333            | 1                |                          |     |                                             |                                            | 7.3                                                           |
|                                                                                                                                                                    | 333            | 1                | 0.05                     |     |                                             |                                            | 7.0                                                           |
|                                                                                                                                                                    | 333            | 1                | 0.15                     |     |                                             |                                            | 7.4                                                           |
| <i>transII/III</i> -[Cr <sup>III</sup> ClL <sub>15</sub> ] <sup>2+</sup><br>plus [Fe(CN) <sub>6</sub> ] <sup>4-</sup>                                              | 303            | 1                |                          | 4.0 | 0.50                                        | 5.0                                        | 0.40                                                          |
|                                                                                                                                                                    |                |                  |                          |     |                                             | 10                                         | 0.80                                                          |
|                                                                                                                                                                    |                |                  |                          |     |                                             | 20                                         | 1.5                                                           |
|                                                                                                                                                                    |                |                  |                          |     |                                             | 40                                         | 2.6                                                           |
|                                                                                                                                                                    |                |                  |                          |     |                                             | 100                                        | 6.9                                                           |
|                                                                                                                                                                    | 308            | 300              |                          |     | 0.25                                        | 8.0                                        | 0.62                                                          |
|                                                                                                                                                                    |                |                  |                          |     |                                             | 30                                         | 1.4                                                           |
|                                                                                                                                                                    |                |                  |                          |     |                                             | 80                                         | 2.5                                                           |
|                                                                                                                                                                    |                |                  |                          |     |                                             | 120                                        | 3.2                                                           |
|                                                                                                                                                                    |                | 600              |                          |     |                                             | 8.0                                        | 0.30                                                          |
|                                                                                                                                                                    |                |                  |                          |     |                                             | 40                                         | 1.2                                                           |
|                                                                                                                                                                    |                |                  |                          |     |                                             | 80                                         | 2.0                                                           |
|                                                                                                                                                                    |                |                  |                          |     |                                             | 150                                        | 2.8                                                           |
|                                                                                                                                                                    |                | 900              |                          |     |                                             | 8.0                                        | 0.25                                                          |



s.p.4

|                                                                                                         |     |      |  |     |      |      |      |
|---------------------------------------------------------------------------------------------------------|-----|------|--|-----|------|------|------|
|                                                                                                         |     |      |  |     |      | 20   | 0.71 |
|                                                                                                         |     | 1    |  |     | 5.0  | 0.5  | 0.38 |
|                                                                                                         |     |      |  |     | 7.0  |      | 0.41 |
|                                                                                                         |     |      |  |     | 10   |      | 0.53 |
|                                                                                                         |     |      |  |     | 15   |      | 0.61 |
|                                                                                                         |     |      |  |     | 20   |      | 0.68 |
|                                                                                                         | 343 | 1    |  |     |      | 5.0  | 1.0  |
|                                                                                                         |     |      |  |     |      | 7.0  | 1.2  |
|                                                                                                         |     |      |  |     |      | 10   | 1.4  |
|                                                                                                         |     |      |  |     |      | 15   | 1.5  |
|                                                                                                         |     |      |  |     |      | 20   | 1.7  |
|                                                                                                         | 353 | 1    |  |     |      | 5.0  | 2.6  |
|                                                                                                         |     |      |  |     |      | 7.0  | 3.1  |
|                                                                                                         |     |      |  |     |      | 10   | 3.4  |
|                                                                                                         |     |      |  |     |      | 15   | 3.7  |
|                                                                                                         |     |      |  |     |      | 20   | 3.9  |
|                                                                                                         |     |      |  |     |      | 40   | 4.3  |
|                                                                                                         | 346 | 300  |  |     | 0.50 | 58   | 3.2  |
|                                                                                                         |     |      |  |     |      | 80   | 3.3  |
|                                                                                                         |     | 600  |  |     |      | 29   | 3.5  |
|                                                                                                         |     |      |  |     |      | 60   | 3.6  |
|                                                                                                         |     | 900  |  |     |      | 3.0  | 1.2  |
|                                                                                                         |     |      |  |     |      | 29   | 2.8  |
|                                                                                                         |     |      |  |     |      | 58   | 3.7  |
|                                                                                                         |     |      |  |     |      | 80   | 3.8  |
|                                                                                                         |     | 1200 |  |     |      | 58   | 4.2  |
|                                                                                                         |     |      |  |     |      | 80   | 4.0  |
|                                                                                                         |     | 1500 |  |     |      | 58   | 4.7  |
|                                                                                                         |     |      |  |     |      | 80   | 4.6  |
| <i>trans</i> -[Cr <sup>III</sup> (OH) <sub>2</sub> (L <sub>15</sub> )] <sup>+</sup> plus                | 323 | 1    |  | 9.0 | 0.10 | 0.50 | 2.3  |
| [{ <i>cis</i> -V-L <sub>13</sub> Co <sup>III</sup> NC}Fe <sup>II</sup> (CN) <sub>5</sub> ] <sup>-</sup> |     |      |  |     |      | 1.0  | 2.7  |
|                                                                                                         |     |      |  |     |      | 2.5  | 3.0  |
|                                                                                                         |     |      |  |     |      | 5.0  | 3.4  |
|                                                                                                         |     |      |  |     |      | 10   | 3.7  |
|                                                                                                         |     |      |  |     |      | 20   | 3.9  |
|                                                                                                         | 333 |      |  |     |      | 0.50 | 4.9  |



s.p.6

**Figure S1.-** Eyring plot for the slow process observed on solution of the  $[\text{CrL}_{15}\text{Cl}]^{2+}$  complexes depending on the starting material.

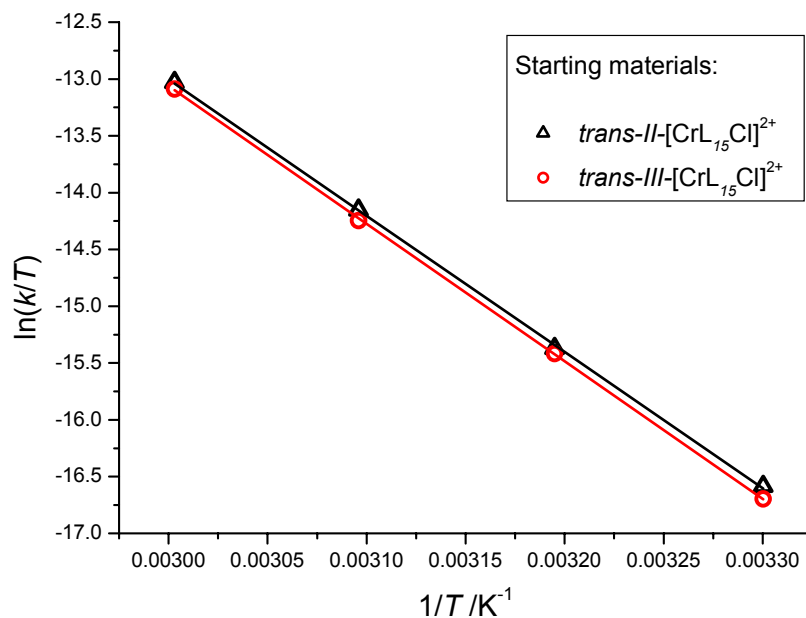

**Figure S2.-** Uv-vis changes of the spectrum of a solution of the dinuclear complex  $[\{(\text{HL}_{15})(\text{H}_2\text{O})\text{Cr}^{\text{III}}\text{NC}\}\text{Fe}^{\text{II}}(\text{CN})_5]$ ,  $4 \times 10^{-4}$  M, with  $\text{S}_2\text{O}_8^{2-}$ ,  $45 \times 10^{-3}$  M, at pH = 4 and 25 °C.

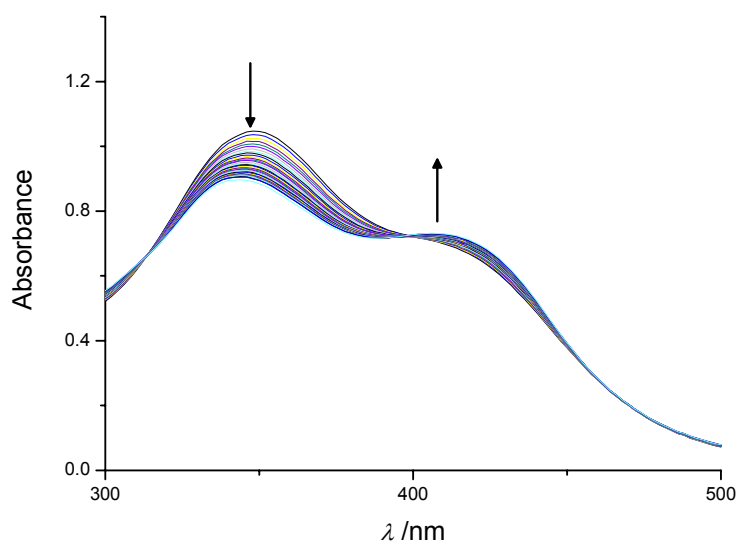

**Figure S3.-** Electronic spectrum changes of a solution of complex  $cis-[\{(L_{15})(OH)Cr^{III}NC\}\{cis-V-L_{13}Co^{III}NC\}Fe^{II}(CN)_4]^+$  with pH.

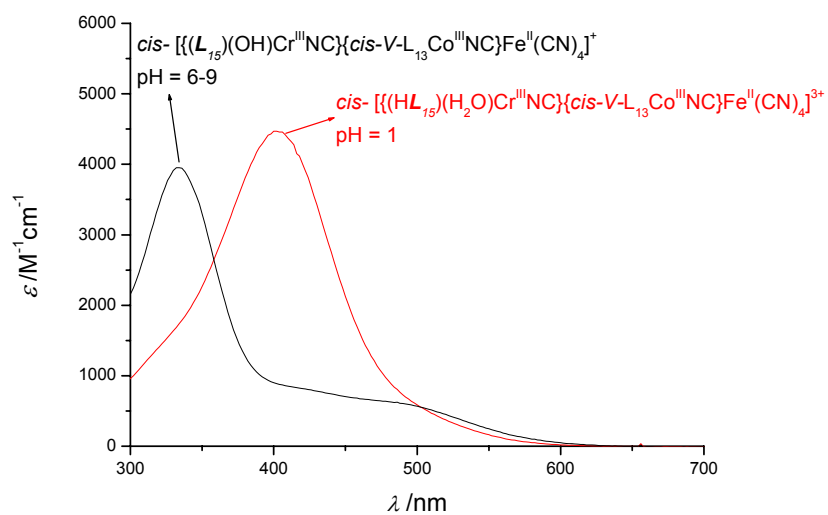

*s.p.*8

### **Kinetics of the *trans-II* or *trans-III*-[CrClL<sub>15</sub>]<sup>2</sup> reaction at pH 9.-**

The values of the kinetic and activation parameters obtained for the process carried out with any of the two starting materials (*trans-II* or *trans-III*, Figure S1) at [OH<sup>-</sup>] = 0.1 M are <sup>323</sup>*k* = 2.2 × 10<sup>-4</sup> s<sup>-1</sup>, Δ*H*<sup>‡</sup> = 106 ± 1 kJ/mol, Δ*S*<sup>‡</sup> = -6 ± 3 J K/mol, Δ*V*<sup>‡</sup> = 6.3 ± 0.5 cm<sup>3</sup>mol<sup>-1</sup> (327 K) and independent of the value of [OH<sup>-</sup>] in the 0.05-0.15 M range, as expected from the trends observed in previous literature. The large enthalpy value is the expected for a dissociatively activated conjugate base mechanism. As for Δ*S*<sup>‡</sup>, the zero value obtained does not agree with a simple dissociation of the ligand, nevertheless organization of the solvent in these systems, including hydrogen bonding between the dangling amine and the entering water ligand, can be held responsible for the shift to more negative values, as well as for the increased discrimination (RNH<sub>2</sub>/OH<sup>-</sup>) observed with respect to the Co<sup>III</sup> analogues. Finally, the values determined for Δ*V*<sup>‡</sup> are also definitively less positive than expected for similar processes which possibly indicates a certain compression of the entering aqua ligand *via* hydrogen bonding to the generated dangling amine group.
